# Supplementary material for: Plasmonic photocatalyst Ag@AgCl/ZnSn(OH)6: synthesis, characterization and enhanced visible-light photocatalytic activity in the decomposition of dyes and phenol
Source: Royal Society of Chemistry journal article supplement (doi:10.1039/c5ra10480g), 2015-01-01
Supplement: c5ra10480g1.pdf [file c5ra10480g1.pdf]

# Plasmonic photocatalyst Ag@AgCl/ZnSn(OH)<sub>6</sub>: Synthesis, characterization and enhanced visible-light photocatalytic activities in the decomposition of dyes and phenol

Fei Chen<sup>a,b</sup>, Qi Yang<sup>a,b,\*</sup>, Chenggang Niu<sup>a,b</sup>, Xiaoming Li<sup>a,b</sup>, Chang Zhang<sup>a,b</sup>, Guangming Zeng<sup>a,b</sup>

<sup>a</sup> College of Environmental Science and Engineering, Hunan University, Changsha 410082, P.R. China

<sup>b</sup> Key Laboratory of Environmental Biology and Pollution Control (Hunan University), Ministry of Education, Changsha 410082, P.R. China

Author information

First author: E-mail: [feichen@hnu.edu.cn](mailto:feichen@hnu.edu.cn) (Fei Chen)

\*Corresponding author: E-mail: [Yangqi@hnu.edu.cn](mailto:Yangqi@hnu.edu.cn)

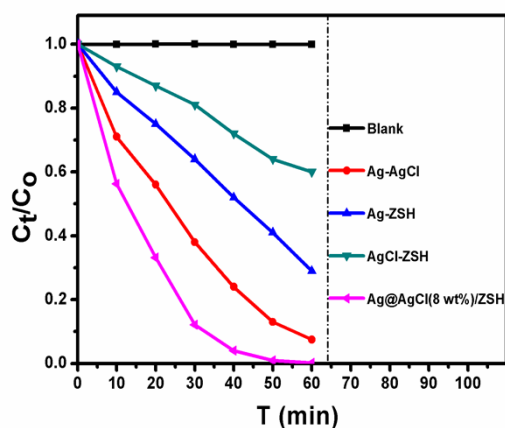

**Figure S1** Comparison of the photocatalytic activities in degradation of RhB by ZSH, Ag@AgCl, Ag-ZSH and Ag@AgCl(8 wt%)/ZSH.

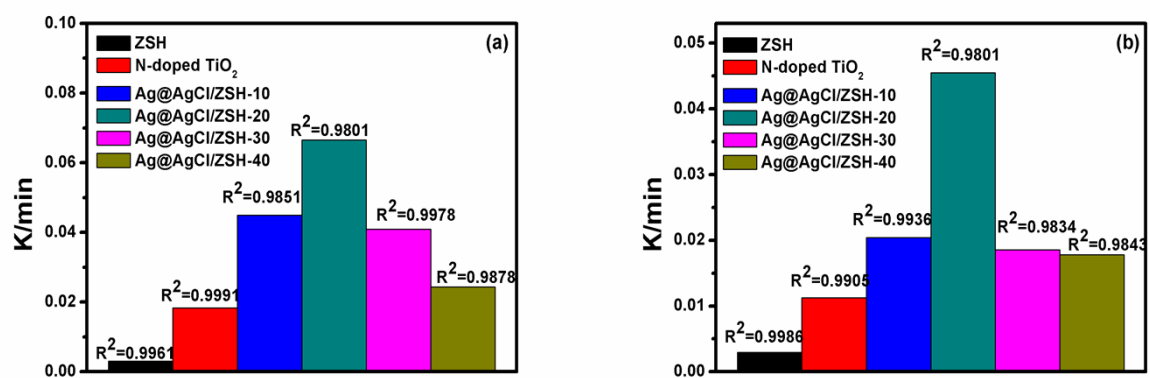

**Figure S2** The degradation rate constants of RhB (a) and CV (b) solution with different samples.

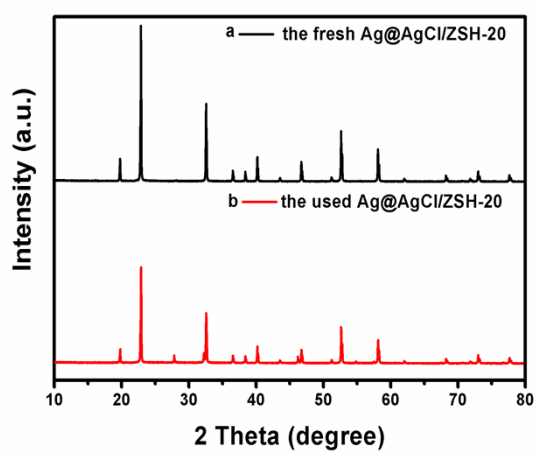

**Figure S3** The XRD patterns of the used and fresh Ag@AgCl/ZSH-20 in the photodegradation of RhB solution under visible light irradiation for five consecutive cycles.
